# Supplementary material
Source: PubMed Central journal article supplement (PMC3127677)

1 Table S1. PCR primers

| Primer | Use                         | Sequence (5' → 3')                                |
|--------|-----------------------------|---------------------------------------------------|
| JC17   | <i>SATI</i> flipper         | GGCCCCCCTCGAGGAAGTT                               |
| JC18   | <i>SATI</i> flipper         | GCTCTAGAAGTGGATCT                                 |
| JC57   | 5'NCR of <i>CNA1</i>        | AATGATGGAGTTTATGGGAA                              |
| JC58   | 5'NCR of <i>CNA1</i>        | <u>AACTTCCTCGAGGGGGGGCCGAAAAAAGGGGGGGG</u>        |
| JC59   | 3'NCR of <i>CNA1</i>        | <u>AGATCCACTAGTTCTAGAGCTTCTCTCCTCCTCCTCCTC</u>    |
| JC60   | 3'NCR of <i>CNA1</i>        | TGCCCTTTTCTTTGTTTTG                               |
| JC61   | <i>CNA1</i> overlap         | AACAACAATAAGGTGGATGGG                             |
| JC62   | <i>CNA1</i> overlap         | TATCTTACCCCTACCTGGTGG                             |
| JC63   | <i>CNA1</i> ORF             | GTCAGGAAATACTGTTCAACG                             |
| JC64   | <i>CNA1</i> ORF             | CTTCATATAATTGTTCCGA                               |
| JC48   | Disruption confirmation     | ACAATCAAAGGTGGTCTT                                |
| JC81   | Disruption confirmation     | AACTTCCTCGAGGGGGGGCC                              |
| JC82   | 5'NCR of <i>CNB1</i>        | TGTTGTTGGGTAGGTTGCTGT                             |
| JC83   | 5'NCR of <i>CNB1</i>        | <u>AACTTCCTCGAGGGGGGGCCCTTGTGAAGTTGGATTGGTTG</u>  |
| JC86   | 3'NCR of <i>CNB1</i>        | <u>AGATCCACTAGTTCTAGAGCAGCACCTGTAAGATGGTTTTAG</u> |
| JC87   | 3'NCR of <i>CNB1</i>        | TGTCCAAAACGGTTTCCAG                               |
| JC88   | <i>CNB1</i> overlap         | TGCCTTCTGTTTCGATTGAT                              |
| JC89   | <i>CNB1</i> overlap         | CGACAATAATTGGAATGATGA                             |
| JC79   | <i>CNB1</i> ORF             | ATGGGGGCTAACGCAAGTATT                             |
| JC80   | <i>CNB1</i> ORF             | TTTAAGGTCAAAGTGTGGCA                              |
| JC100  | 5'NCR of <i>CRZ1</i>        | AATATAGAGACGGTGTGTGGG                             |
| JC101  | 5'NCR of <i>CRZ1</i>        | <u>AACTTCCTCGAGGGGGGGCCGGACAAAATGAAATATAGC</u>    |
| JC102  | 3'NCR of <i>CRZ1</i>        | <u>AGATCCACTAGTTCTAGAGCTCAACTTGTGGTTTGTCTTT</u>   |
| JC103  | 3'NCR of <i>CRZ1</i>        | CTAATGTCATGACTTCCCCA                              |
| JC104  | <i>CRZ1</i> overlap         | TGAGACATAAAAAGGCGAC                               |
| JC105  | <i>CRZ1</i> overlap         | TGATCTCGATATGATTGTCC                              |
| JC106  | <i>CRZ1</i> ORF             | TAATCCCTATCCACAGGACGA                             |
| JC107  | <i>CRZ1</i> ORF             | ATCACTGGGGGAACAAAAC                               |
| JC320  | <i>CRZ1</i> complementation | AAAAAACCGCGGTCAACTTGTGGTTTGTCTTT                  |
| JC321  | <i>CRZ1</i> complementation | AAAAAAGAGCTCGTGATGAATCATGAGTCCGA                  |
| JC288  | <i>CRZ1</i> complementation | AAGGTACCAATATAGAGACGGTGTGTGGG                     |
| JC289  | <i>CRZ1</i> complementation | AAAAGCTTAGTAATTTCAACACCACTACT                     |
| JC292  | qPCR <i>ACT1</i> ORF        | AGCTCCAGAAGCTTTGTTTCAGACC                         |
| JC293  | qPCR <i>ACT1</i> ORF        | TGCATACGTTTCAGCAATACCTGGG                         |
| JC345  | qPCR <i>CNA1</i> ORF        | GCTTCACCTCATCCTTATTGGT                            |
| JC346  | qPCR <i>CNA1</i> ORF        | GGTGACACTGGTGTGTTGTTT                             |
| JC329  | qPCR <i>CNB1</i> ORF        | TGAAGAGATCGATAGATTGCG                             |
| JC330  | qPCR <i>CNB1</i> ORF        | TTCCCGAGAATGCAGATAACC                             |
| JC347  | qPCR <i>CRZ1</i> ORF        | CACAACAATGGCGATGGTAATA                            |
| JC348  | qPCR <i>CRZ1</i> ORF        | ACCTTGATGCATGACTTTTCCT                            |
| JC337  | qPCR <i>PMCI</i> ORF        | TTGAAACAAGGTGTTGCTGAAG                            |
| JC338  | qPCR <i>PMCI</i> ORF        | ATTGTGGTCTTCCATACATGA                             |
| JC341  | qPCR <i>PMRI</i> ORF        | TGAGTACCAGTATCGCTGCATT                            |
| JC342  | qPCR <i>PMRI</i> ORF        | GATCACCTGTCGGGTAAGAATC                            |
| JC362  | qPCR <i>CCH1</i> ORF        | TGTCACTGATGAAGCTGGCAAA                            |
| JC363  | qPCR <i>CCH1</i> ORF        | TGATTAAGCTTAGCCACTGGTGTG                          |
| JC364  | qPCR <i>MIDI</i> ORF        | TGCCGTAACCTATACCTCGATGTTC                         |

JC365          qPCR *MIDI* ORF          GGCATAAAAATCCAAAATCAGC

---

1 Underline indicates sequences complementary to the *SATI* flipper

2

1 **Figure S1. *C. dubliniensis* *CNA1*, *CNB1*, and *CRZ1* genes were disrupted with the *SAT1***  
2 **flipper.**

3 (A) Structure of the *CNA1* disruption allele that was made by overlap PCR (see materials and  
4 methods for details). PpuMI was used to digest genomic DNAs extracted from specific strains.  
5 The PpuMI restriction sites are indicated 5' (-) and 3' (+) of the *CNA1* gene. The probe is marked  
6 as a bold line. The thick dark arrows represent the FRT sites for *FLP* recombinase. The thinner  
7 arrow on a raised line represents *C. albicans* *MAL2* promoter and the stick with a ball represents  
8 *C. albicans* *ACT1* terminator. The Southern blot is shown in the right panel. Sizes of each band  
9 were labeled. The strains are WT (CD36), *CNA1/cna1::SAT1-FLP* (YC31), *CNA1/cna1* (YC36),  
10 *cna1/cna1::SAT1-FLP* (YC40), *CNA1/cna1::SAT1-FLP* (YC29), *CNA1/cna1* (YC73), and  
11 *cna1/cna1::SAT1-FLP* (YC94). (B) Genomic DNA from *CNB1* disruptants was digested with  
12 *HpaI*. The strains are WT (CD36), *CNB1/cnb1::SAT1-FLP* (YC47), *CNB1/cnb1* (YC69),  
13 *cnb1/cnb1::SAT1-FLP* (YC87), *CNB1/cnb1::SAT1-FLP* (YC41), *CNB1/cnb1* (YC82), and  
14 *cnb1/cnb1::SAT1-FLP* (YC96). (C) Genomic DNA from *CRZ1* disruptants was digested with  
15 *EcoRV*. The strains are WT (CD36), *CRZ1/crz1::SAT1-FLP* (YC81), *CRZ1/crz1* (YC102),  
16 *crz1/crz1::SAT1-FLP* (YC107), *CRZ1/crz1::SAT1-FLP* (YC80), *CRZ1/crz1* (YC100), and  
17 *crz1/crz1::SAT1-FLP* (YC108).

18  
19 **Figure S2. Complementation by *CRZ1* rescues *crz1/crz1* mutants in various stresses. (A)**

20 Structure of the *CRZ1* complementation allele in plasmid pYC393 (see materials and methods  
21 for details). *EcoRV* was used to digest genomic DNA extracted from specific strains. The probe  
22 is marked as a red bold line. The Southern blot is shown in the right panel. Sizes of each band are  
23 labeled. The strains are WT (CD36), *crz1/crz1::SAT1-FLP* (YC108), *crz1/crz1* (YC280), and  
24 *crz1/crz1 + CRZ1* (YC512). (B) Cells were grown overnight in YPD at 30°C, five-fold serially

1 diluted, and spotted onto YPD medium containing SDS, fluconazole (FL), or CaCl<sub>2</sub> at the  
2 concentrations indicated. The plates were incubated at 30°C for 48 hr and photographed. (C)  
3 Cells were grown overnight and washed twice with ddH<sub>2</sub>O. One hundred microliters containing  
4 ~100 cells were spread on Spider media and incubated at 37°C for 9 days. Scale bar=1 mm.

5  
6 **Figure S3. *C. dubliniensis* calcineurin is dispensable for growth at elevated temperature.**

7 (A) A set of wild type and calcineurin mutants of *C. dubliniensis* and *C. neoformans* were grown  
8 overnight at 24°C, five-fold serially diluted, and spotted onto YPD to grow for 48 hr at various  
9 temperatures. (B) The growth curve of *C. dubliniensis* wild type and mutant strains at 30°C.  
10 Cells were grown overnight at 30°C, washed twice with ddH<sub>2</sub>O, diluted to 0.2 OD/ml in fresh  
11 YPD media and incubated at 30°C with shaking at 250 rpm. The OD<sub>600</sub> of cultures were  
12 measured at 0, 3, 6, 9, 24, and 30 hr. The experiments were performed in triplicate, and data was  
13 plotted using Prism 5.03.

14  
15 **Figure S4. Calcineurin controls increased tolerance to new generation azoles in *C.***  
16 ***dubliniensis*.**

17 Cells were grown overnight in YPD at 30°C, five-fold serially diluted, and spotted onto YPD  
18 medium ± posaconazole (POS) or voriconazole (VOR) at the indicated concentrations. The  
19 plates were incubated at 30°C for 48 hr and photographed.

20  
21 **Figure S5. *crz1/crz1* mutants are hypersensitive to CaCl<sub>2</sub> at elevated temperature in *C.***  
22 ***dubliniensis* and *C. albicans*.**

1 Cells were grown overnight in YPD at 30°C, five-fold serially diluted, and spotted onto YPD  
2 medium ± CaCl<sub>2</sub> at the indicated concentrations. The plates were incubated at 24°C, 30°C, and  
3 37°C for 48 hr and photographed.

4  
5 **Figure S6. Calcineurin is required for germ tube formation in *C. dubliniensis* but not in *C.***  
6 ***albicans*.**

7 (A) Germ tube formation of wild type and mutant strains in liquid spider medium ± FK506 (1  
8 µg/ml) at 37°C incubated for 2 hr on 96-well polystyrene plates. Arrow heads indicate cells with  
9 germ tube formation defects. Scale bar=20 µm. (B) Bar graph showing quantitative percentage of  
10 germ tube formation in wild type and mutant strains of *C. dubliniensis* and *C. albicans*. At least  
11 200 cells were evaluated in each experiment. The experiments were repeated three times, and  
12 error bars represent the mean ± SD. The asterisks represent a statistically significant difference  
13 ( $P<0.05$ ) between wild type and FK506 (1 µg/ml)-treated wild type, *cnal/cnal*, or *cnb1/cnb1*  
14 mutants.

15  
16 **Figure S7. *C. dubliniensis* is as virulent as *C. albicans* in a heterologous insect model.**

17 Survival of *G. mellonella* after injection of 10<sup>6</sup> CFU/larva of *C. dubliniensis* or *C. albicans* was  
18 similar. All infected larva died within 3 days after infection.

19  
20 **Figure S8. *C. dubliniensis* exhibits less hyphal growth and damage to oral epithelial cell**  
21 **compared with *C. albicans*.**

22 (A) FaDu oral epithelial cells were incubated with *C. dubliniensis* or *C. albicans* for 2, 4, or 6 hr,  
23 after which the morphology was examined by differential interference contrast microscopy. Scale  
24 bar=10 µm.

1 (B) FaDu oral epithelial cells were incubated with *C. dubliniensis* or *C. albicans* for 2, 4, and 6  
2 hr, after which the extent of host cell damage was determined using a <sup>51</sup>Cr release assay. Results  
3 are the mean ± SD of three independent experiments. \*P<0.05, \*\*P<0.0005 compared with *C.*  
4 *albicans*.

# Figure S1

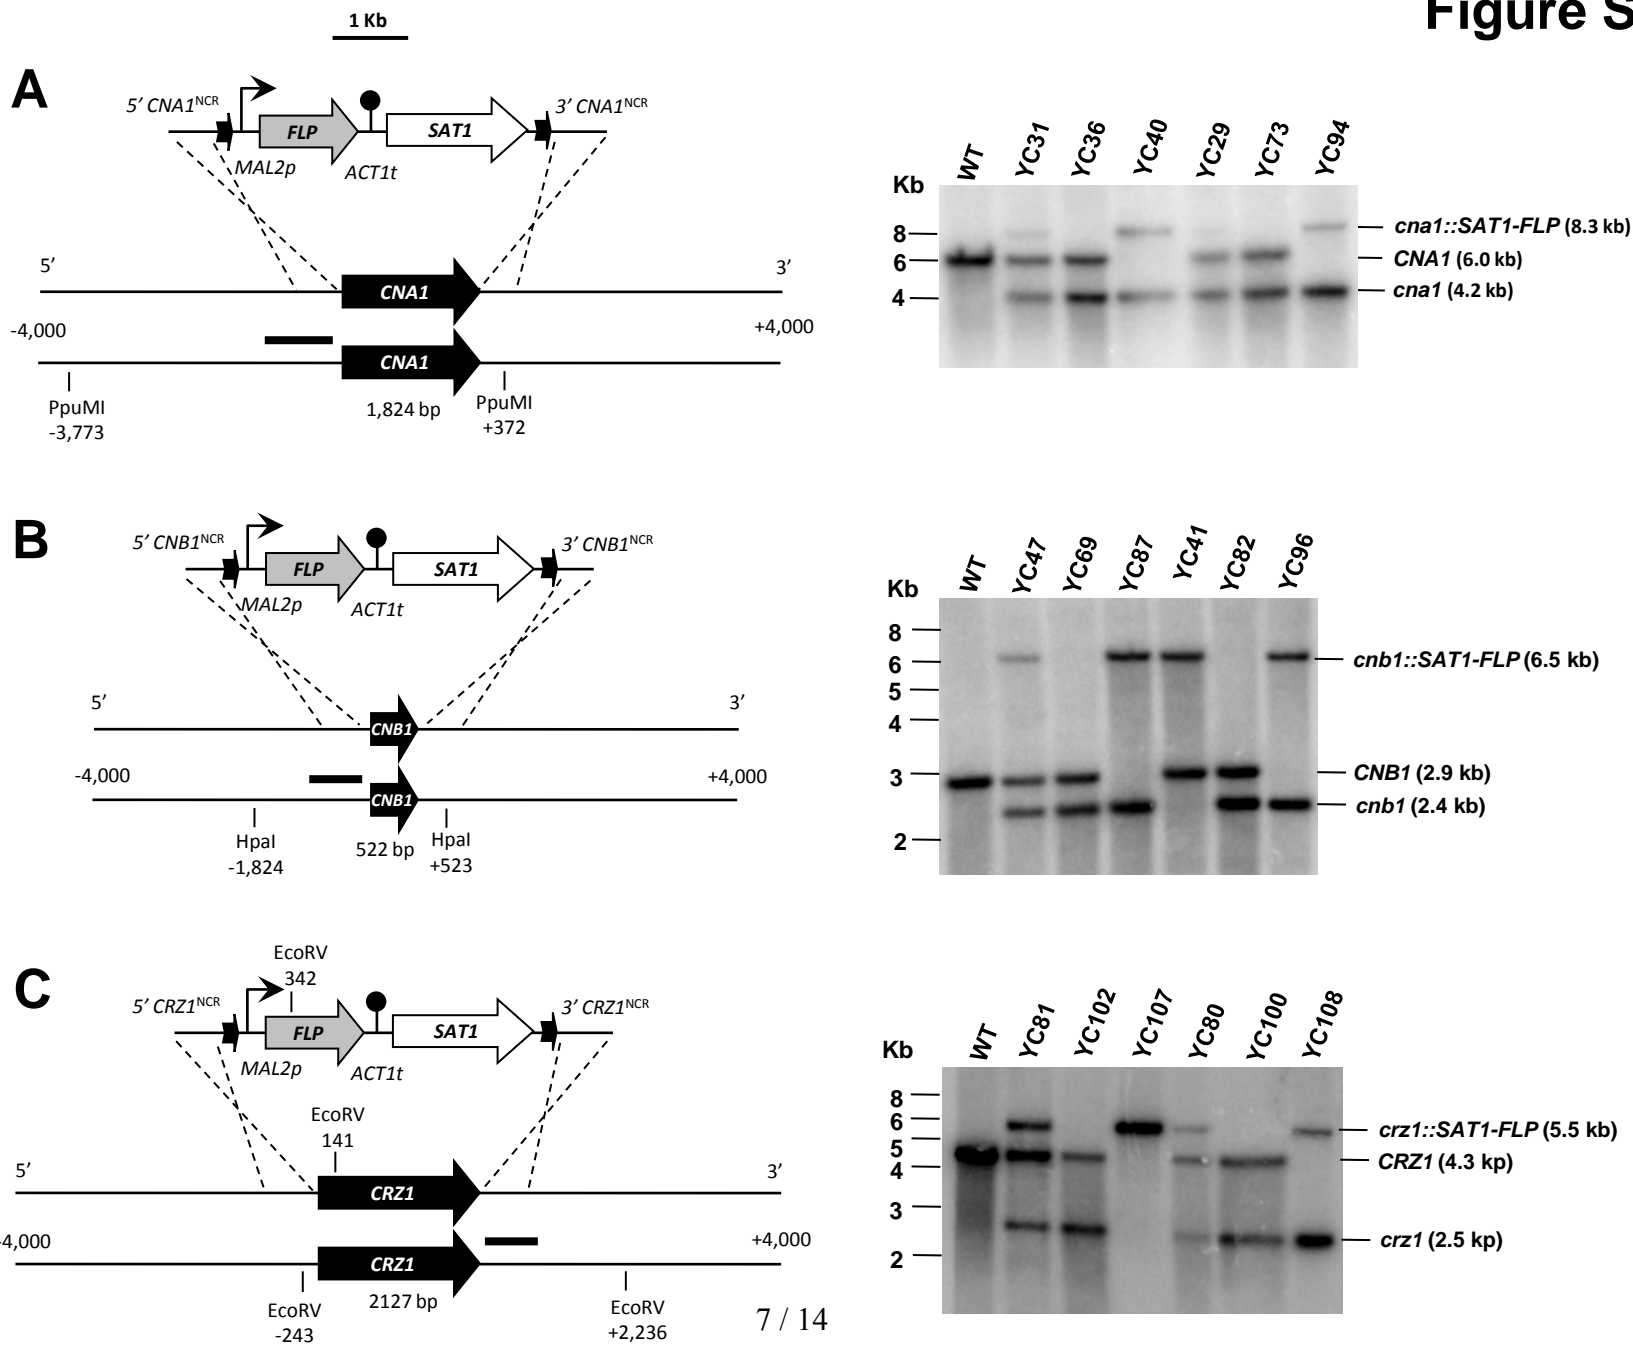

# Figure S2

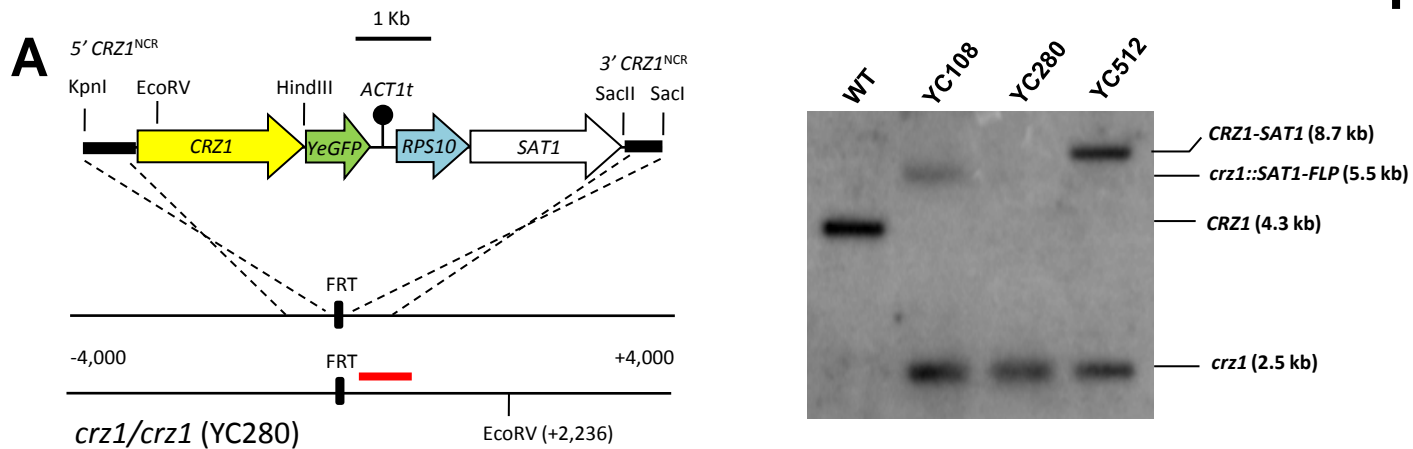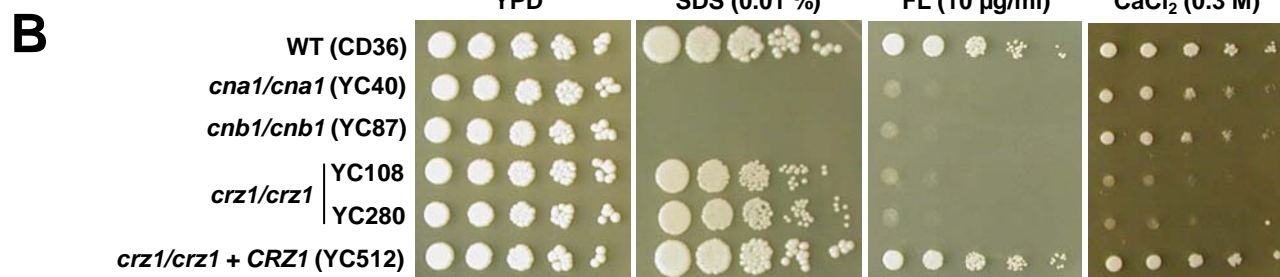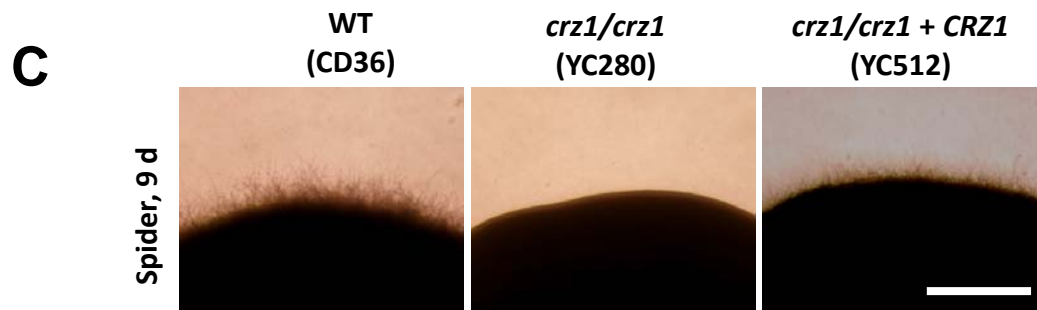



Figure S3

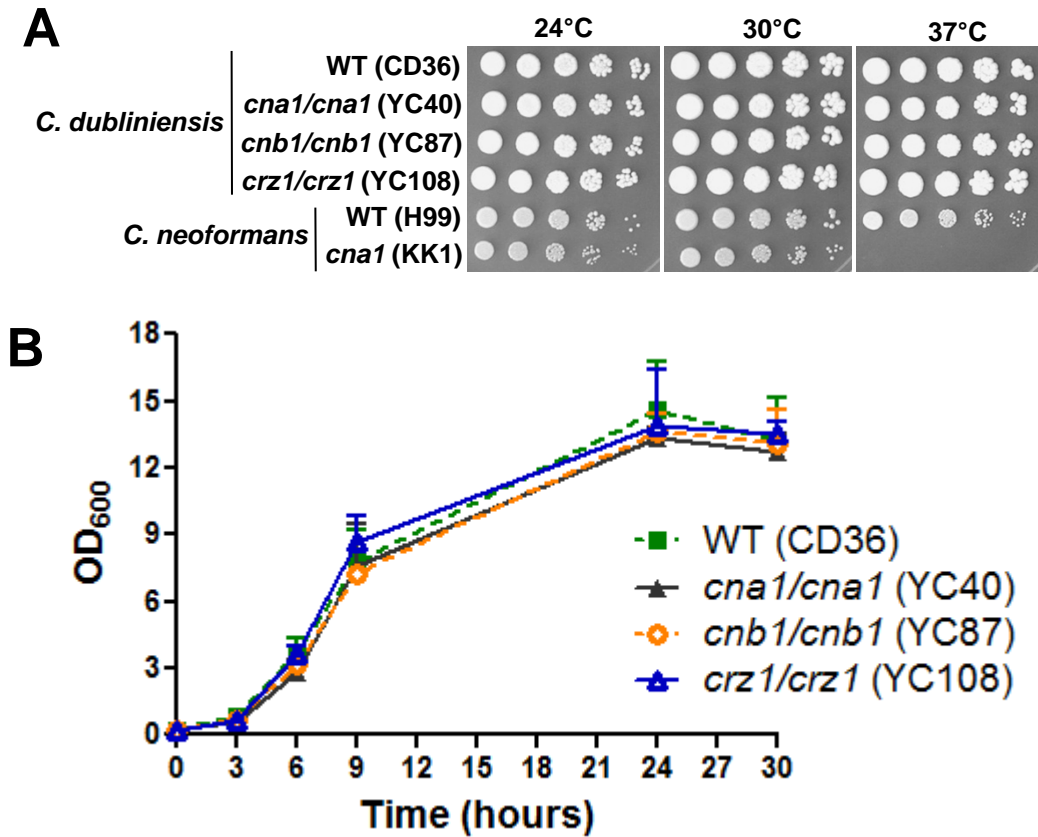

Figure S4

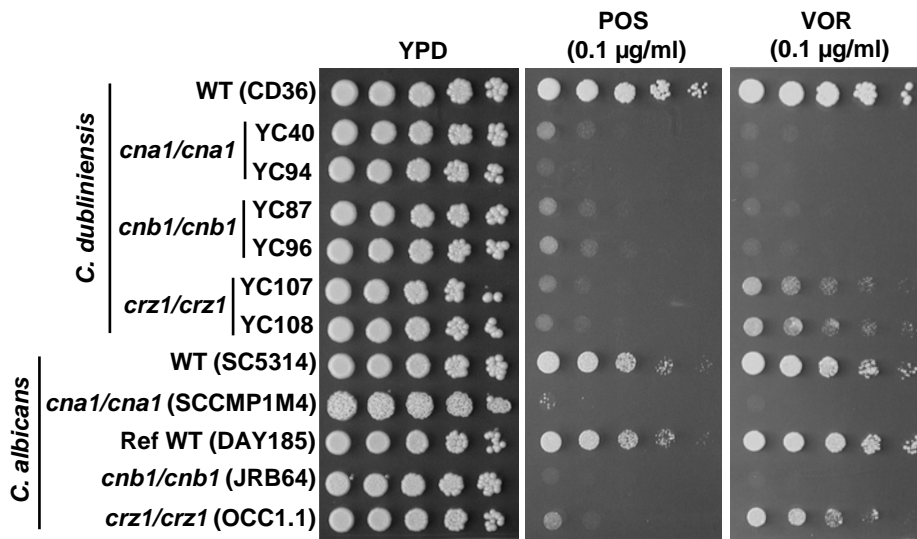

# Figure S5

| <i>C. dubliniensis</i>          | <i>C. albicans</i>                |
|---------------------------------|-----------------------------------|
| WT (CD36)                       | WT (DAY185)                       |
| <i>cna1/cna1</i> (YC40)         | <i>cnb1/cnb1</i> (JRB64)          |
| <i>cna1/cna1</i> (YC94)         | <i>cnb1/cnb1 + CNB1</i> (MCC85)   |
| <i>cnb1/cnb1</i> (YC87)         | <i>crz1/crz1</i> (OCC1.1)         |
| <i>cnb1/cnb1</i> (YC96)         | <i>crz1/crz1 + CRZ1</i> (OCC7)    |
| <i>crz1/crz1</i> (YC107)        | WT (CAF2-1)                       |
| <i>crz1/crz1</i> (YC108)        | <i>cna1/cna1</i> (DSY2091)        |
| <i>crz1/crz1 + CRZ1</i> (YC512) | <i>cna1/cna1 + CNA1</i> (DSY2115) |
|                                 | <i>crz1/crz1</i> (DSY2195)        |
|                                 | <i>crz1/crz1 + CRZ1</i> (MKY268)  |

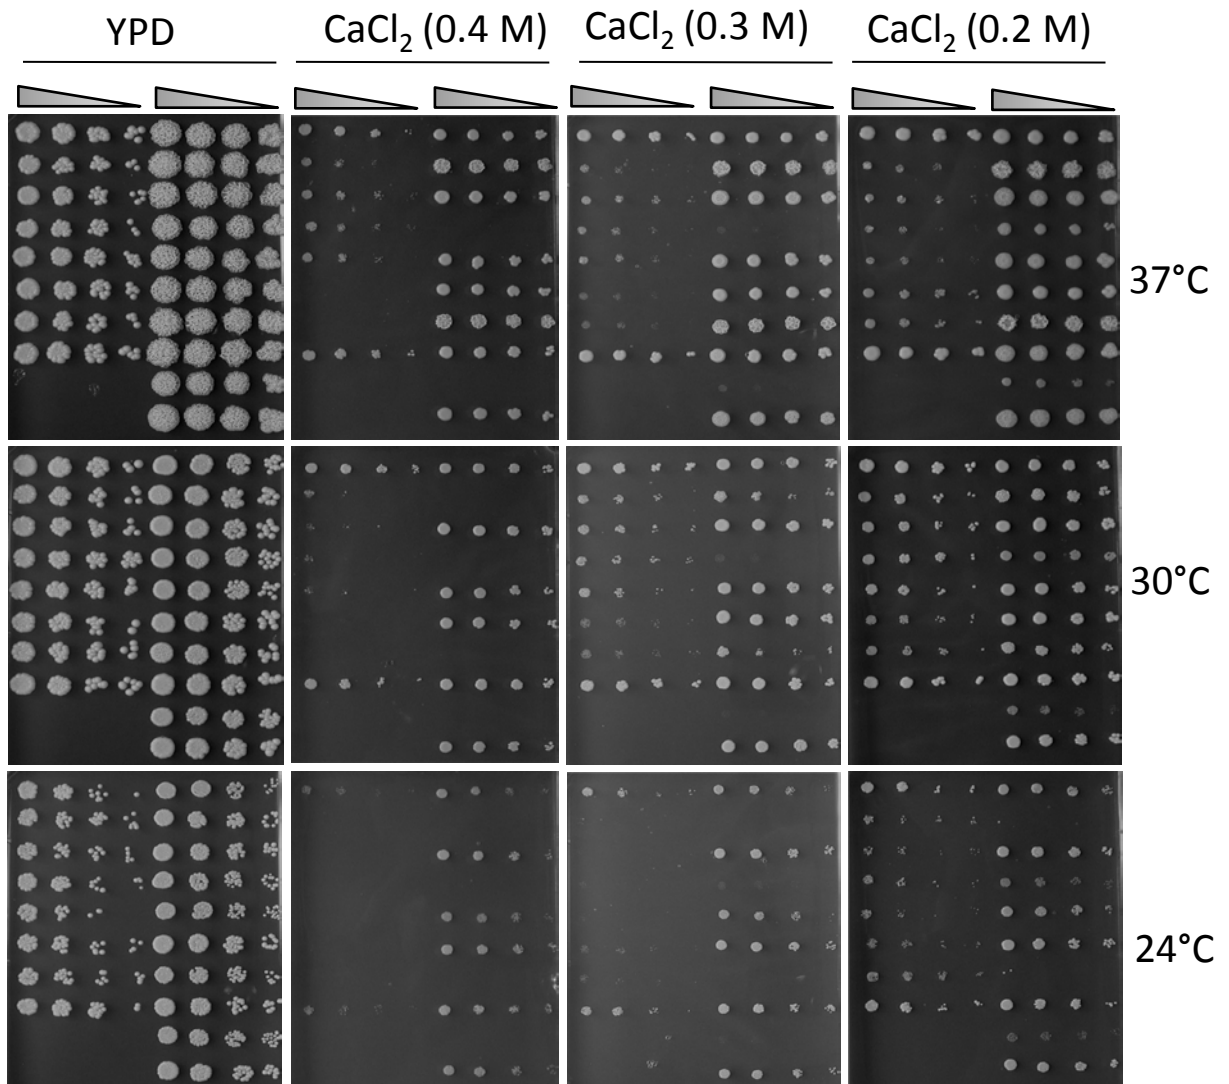

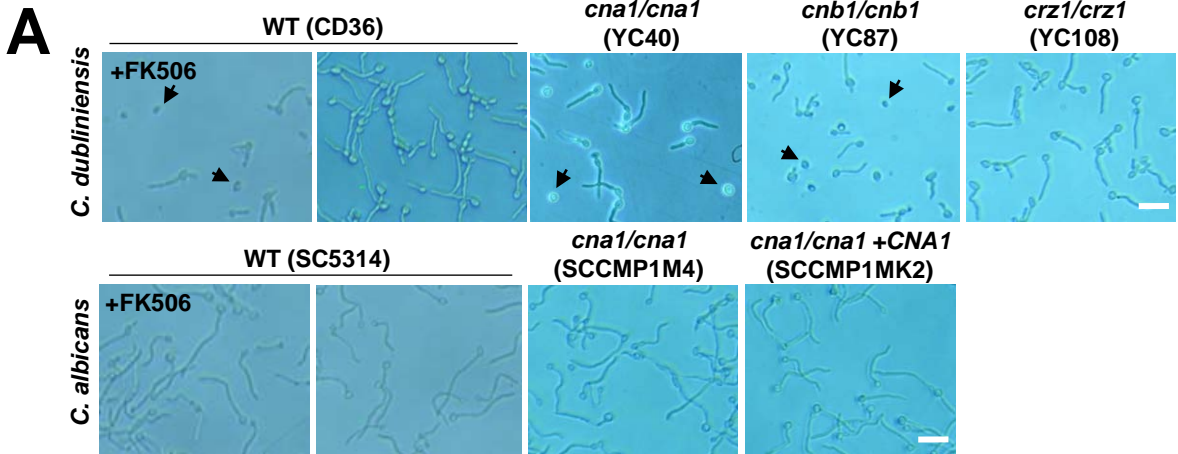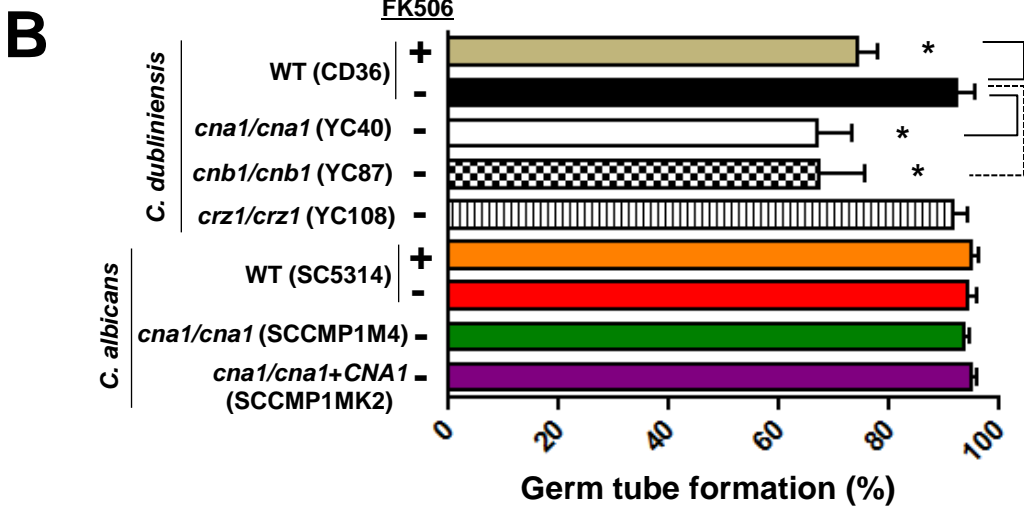

Figure S7

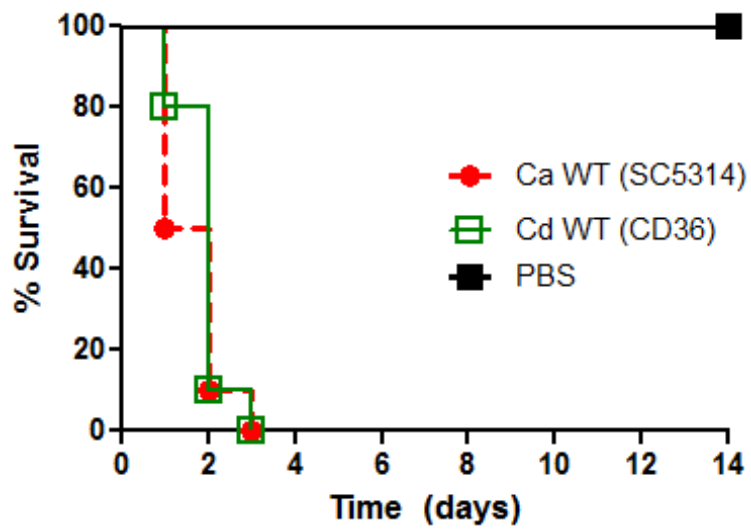

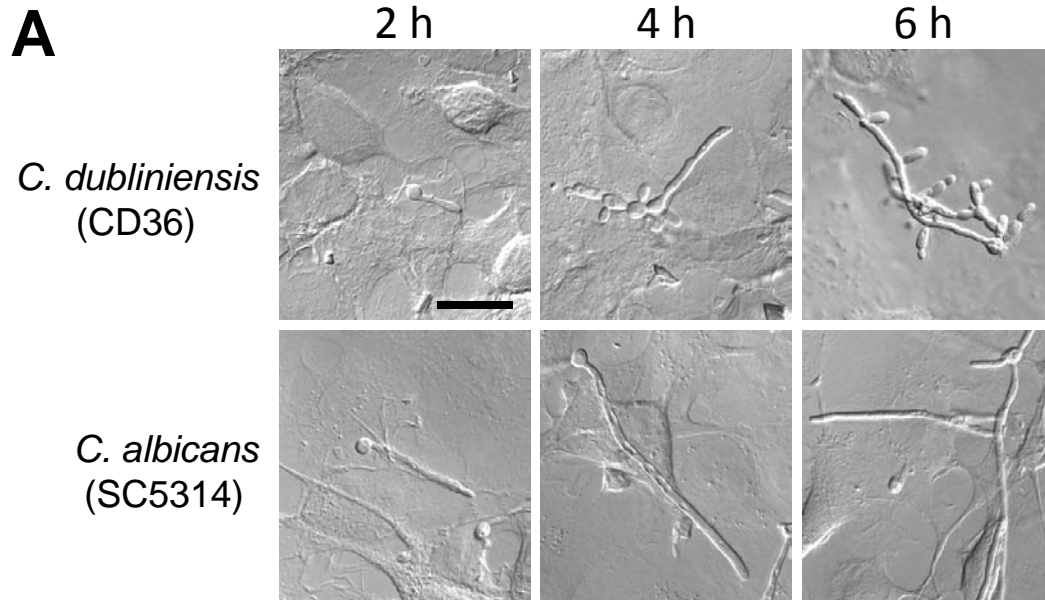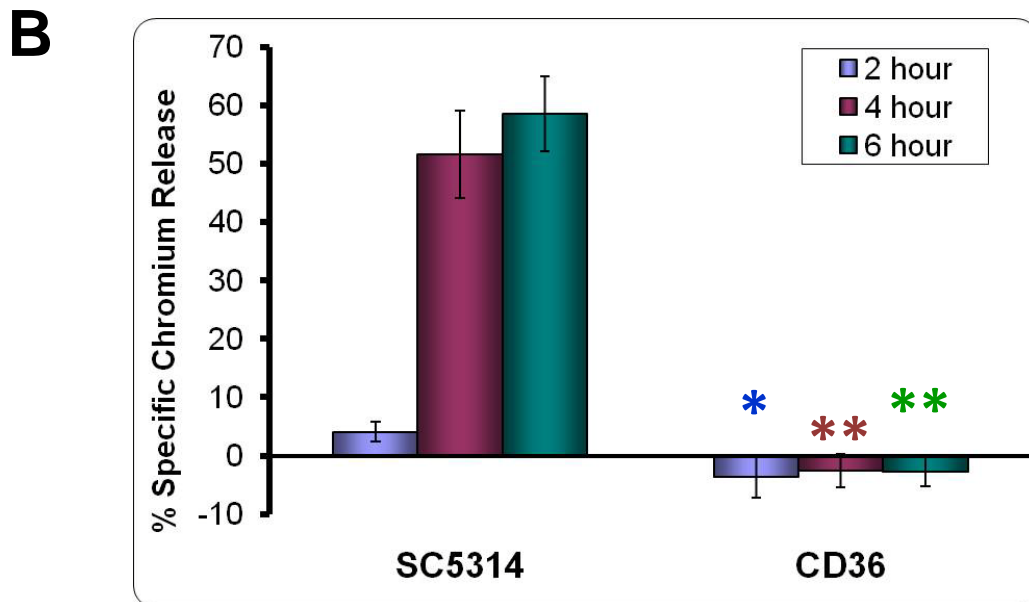

Supplement: supp_10_6_803__1.pdf [file supp_10_6_803__1.pdf]
